# Supplementary material
Source: publisher figshare collection journal article supplement (https://acs.figshare.com/ndownloader/files/13601645)
Supplement: Supplementary file 1 [file 13601645]

---

## Supporting Information

### Halide Ion-mediated Synthesis of L1<sub>0</sub>-FePt Nanoparticles with Tunable Magnetic Properties

Wenjuan Lei,<sup>†</sup> Junjie Xu,<sup>‡</sup> Yongsheng Yu,<sup>\*,†</sup> Weiwei Yang,<sup>\*,†</sup> Yanglong Hou<sup>\*,‡</sup> and Dafa Chen<sup>†</sup>

<sup>†</sup> MIIT Key Laboratory of Critical Materials Technology for New Energy Conversion and Storage, School of Chemistry and Chemical Engineering, Harbin Institute of Technology, Harbin, Heilongjiang 150001, China.

<sup>‡</sup> Beijing Key Laboratory for Magnetoelectric Materials and Devices (BKL-MEMD), Beijing Innovation Center for Engineering Science and Advanced Technology (BIC-ESAT), Department of Materials Science and Engineering, College of Engineering, Peking University, Beijing 100871, China

\* E-mail: [ysyu@hit.edu.cn](mailto:ysyu@hit.edu.cn)

\* E-mail: [yangww@hit.edu.cn](mailto:yangww@hit.edu.cn)

\* E-mail: [hou@pku.edu.cn](mailto:hou@pku.edu.cn)

#### Supporting information including:

The Supporting Information is available free of charge on the ACS Publications website, and includes experiment section, TEM images, XRD patterns and hysteresis

---

loops (Figures S1-S12).

## Experimental details

**Materials.** Platinum (II) acetylacetonate ( $\text{Pt}(\text{acac})_2$ , 97%), potassium hexachloroplatinate (VI) ( $\text{K}_2\text{PtCl}_6$ , 98%), iron (III) acetylacetonate ( $\text{Fe}(\text{acac})_3$ , 98%), ammonium chloride ( $\text{NH}_4\text{Cl}$ , 99.99%), iron chloride tetrahydrate ( $\text{FeCl}_2 \cdot 4\text{H}_2\text{O}$ ), ammonium persulfate ( $(\text{NH}_4)_2\text{SO}_4$ ,  $\geq 98\%$ ), potassium iodide (KI, 99.0%), potassium bromide (KBr, 99.0%), oleylamine (OAm,  $>70\%$ ), hexane (98.5%), ethanol (99.5%) and isopropyl alcohol (99.5%) were all purchased from Aladdin. All the chemicals and solvents were used as received without any purification.

**Preparation of fcc-FePt nanoparticles (NPs).** In the atmosphere of  $\text{N}_2$ , 0.2 mmol  $\text{Pt}(\text{acac})_2$ , 0.2 mmol  $\text{Fe}(\text{acac})_3$  and 10 mL of OAm were mixed with magnetic stirring. The mixture was heated to 100 °C for 30 min to purify the reaction system. Then the reaction solution was heated to 350 °C for 3 h at a heating rate of 5 °C/min. The reaction mixture was precipitated by isopropyl alcohol and collected by centrifugation at 9000 rpm for 5 min, then washed with hexane/ethanol (the volume ratio is 1:3) mixture.

**Preparation of fct-FePt nanoparticles (NPs).** Fct-FePt NPs were prepared by the same method as described above in the preparation of fcc-FePt NPs other than adding  $\text{NH}_4\text{Cl}$  into the reaction mixture. Similarly, the reaction was also run in the presence

---

of KBr, or KI, respectively, to study the effects of different kinds of halide ions. Under the same reaction conditions, the  $\text{Fe}(\text{acac})_3$  was replaced by  $\text{FeCl}_2 \cdot 4\text{H}_2\text{O}$ ,  $\text{Pt}(\text{acac})_2$  was replaced by  $\text{K}_2\text{PtCl}_6$  to confirm that the  $\text{Cl}^-$  play a dominant part on the formation of fct FePt NPs.

**Characterization.** X-ray diffraction (XRD) patterns were collected on a PANanalytical X'Pert Powder with Cu K $\alpha$  radiation ( $\lambda = 1.5418 \text{ \AA}$ ). Transmission electron microscopy (TEM) images were acquired on a JEM-1400 operating at 100 kV (JEOL Ltd). High-resolution TEM (HRTEM) images were obtained on a Talos F200X with an accelerating voltage of 200 kV. Magnetic properties were measured with a Lakeshore 7407 high sensitivity vibrating-sample magnetometer (VSM) with fields up to 3.0 T at room temperature. The compositions were analyzed by inductively coupled plasma atomic emission spectroscopy (ICP-AES). Scanning transmission electron microscopy (STEM) analyses were carried out on a Titan Cubed Themis 60-300 with a probe aberration corrector (resolution  $< 0.059 \text{ nm}$ ), at the National Center for Electron Microscopy in Beijing for Information Science and Technology.

**Figure S1-S12**

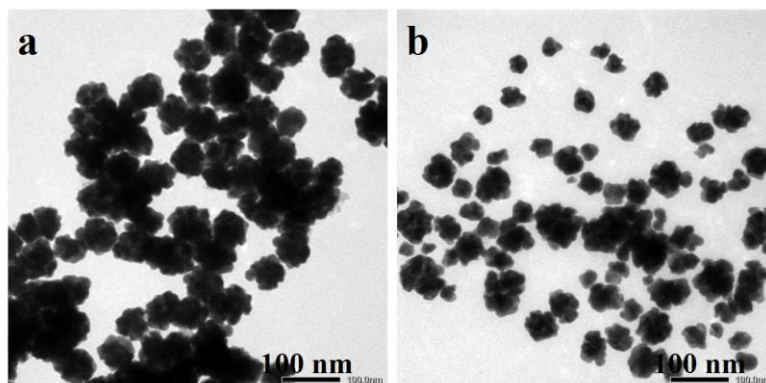

**Figure S1.** The TEM images of as-prepared FePt NPs (a) and ultrasonic treated FePt NPs (b) synthesized with a  $\text{Cl}^-/\text{Pt}^{2+}$  mole ratio of 3:1 at 350 °C for 3 h.

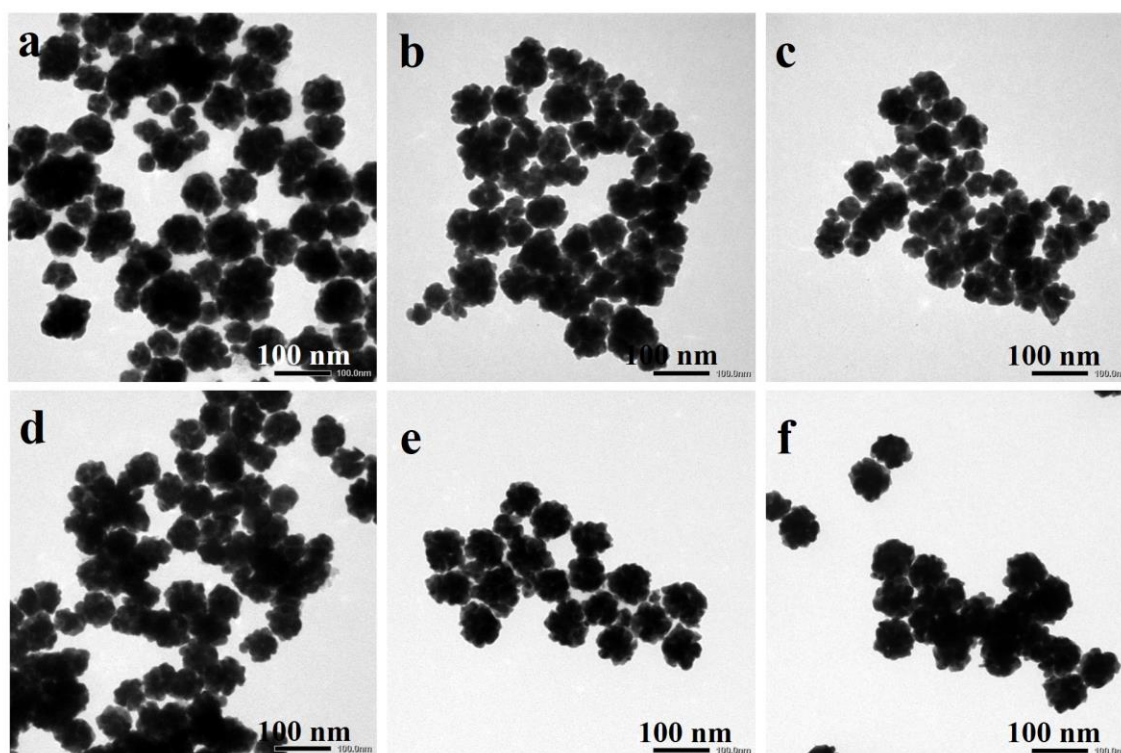

**Figure S2.** The TEM images of FePt NPs synthesized with a  $\text{Cl}^-/\text{Pt}^{2+}$  mole ratio of 3:1 at 350 °C for (a) 0.5 h, (b) 1 h (c) 2 h, (d) 3 h, (e) 6 h and (f) 9 h.

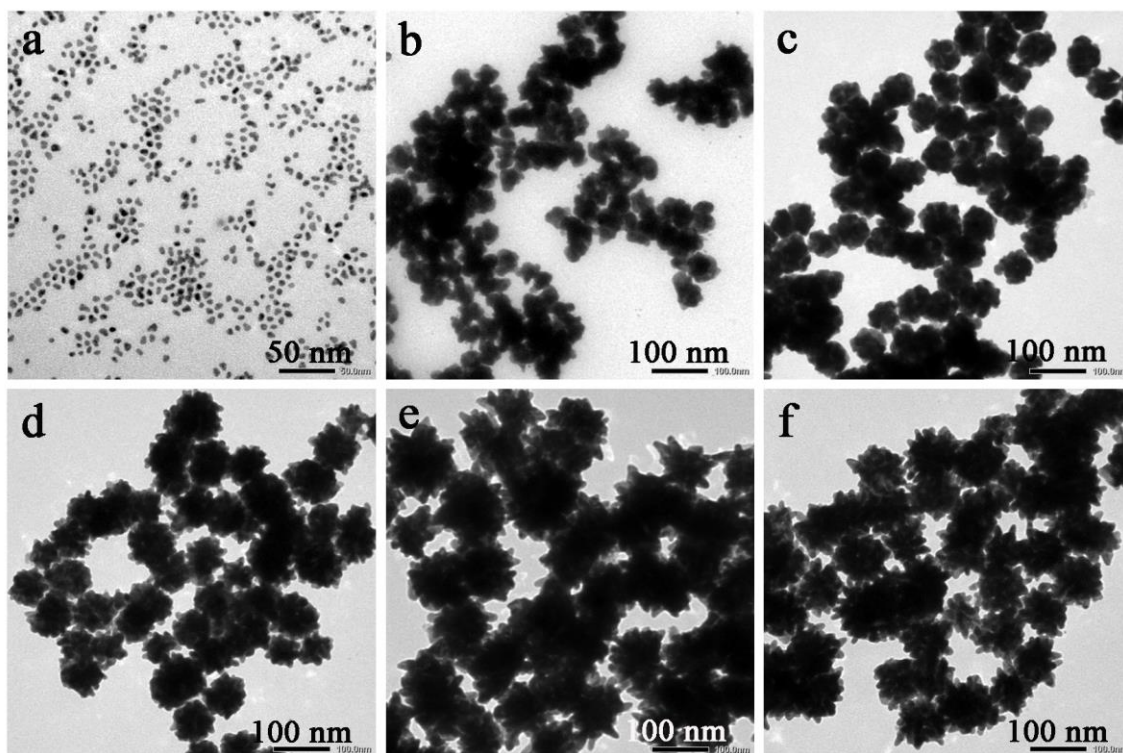

**Figure S3.** The TEM images of FePt NPs synthesized with a different Cl<sup>-</sup>/Pt<sup>2+</sup> mole ratio at 350 °C for 3 h: (a) 0:1, (b) 2:1, (c) 3:1, (d) 4:1, (e) 5:1 and (f) 6:1.

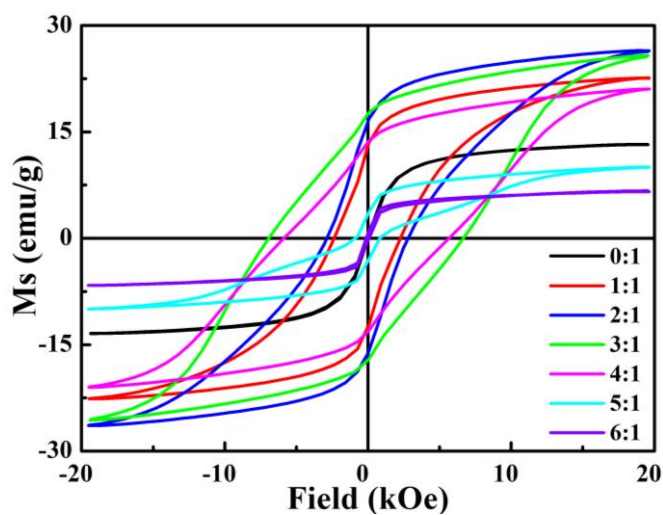

**Figure S4.** The hysteresis loops of FePt NPs synthesized with a different Cl<sup>-</sup>/Pt<sup>2+</sup> mole ratio at 350 °C for 3 h.

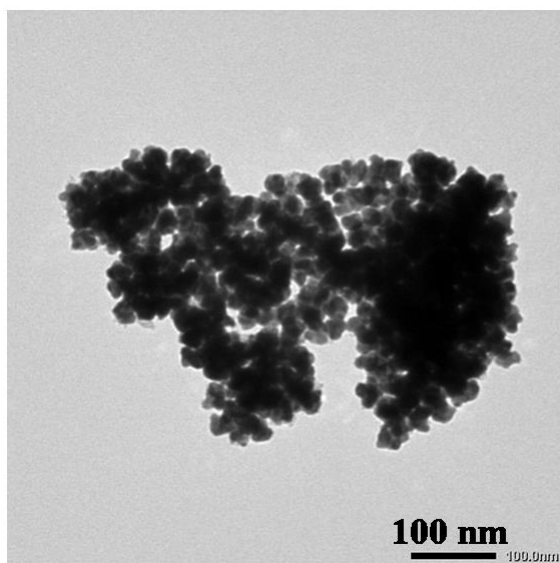

**Figure S5.** The TEM image of the NPs synthesized with  $\text{FeCl}_2 \cdot 4\text{H}_2\text{O}$  and  $\text{Pt}(\text{acac})_2$  at 350 °C for 3 h.

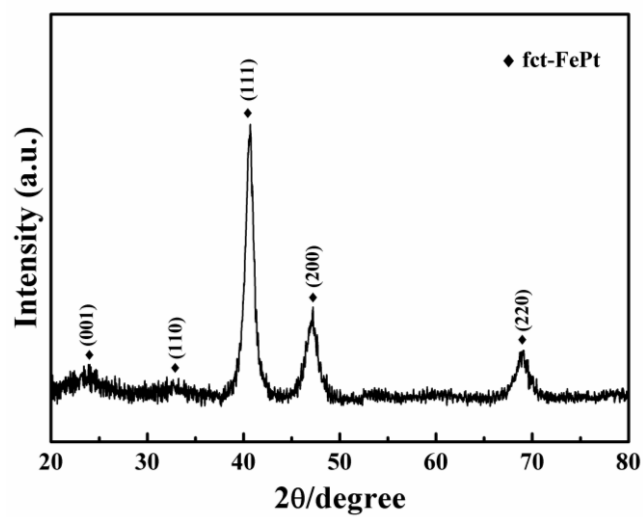

**Figure S6.** The XRD pattern of the NPs synthesized with  $\text{FeCl}_2 \cdot 4\text{H}_2\text{O}$  and  $\text{Pt}(\text{acac})_2$  at 350 °C for 3 h.

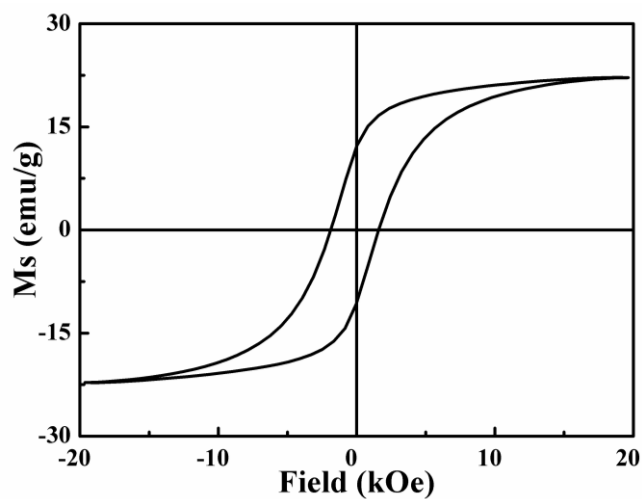

**Figure S7.** The hysteresis loop of the NPs synthesized with  $\text{FeCl}_2 \cdot 4\text{H}_2\text{O}$  and  $\text{Pt}(\text{acac})_2$  at  $350\text{ }^\circ\text{C}$  for 3 h.

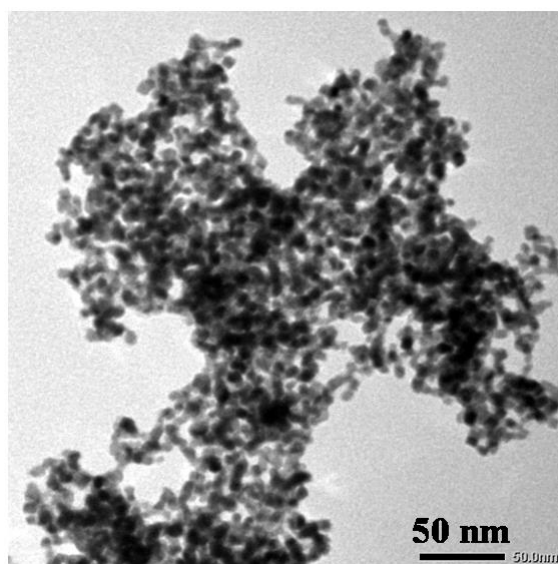

**Figure S8.** The typical TEM image of the NPs synthesized by replacing  $\text{NH}_4\text{Cl}$  with  $(\text{NH}_4)_2\text{SO}_4$  at  $350\text{ }^\circ\text{C}$  for 3 h.

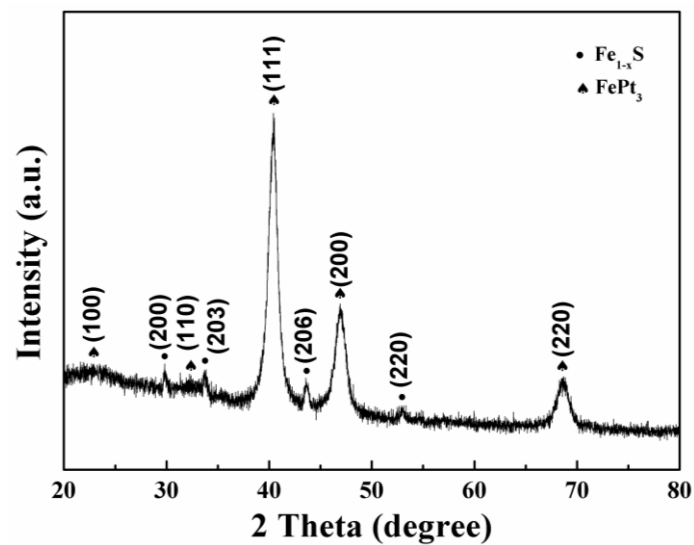

**Figure S9.** The XRD pattern of the NPs synthesized by replacing  $\text{NH}_4\text{Cl}$  with  $(\text{NH}_4)_2\text{SO}_4$  at 350 °C for 3 h.

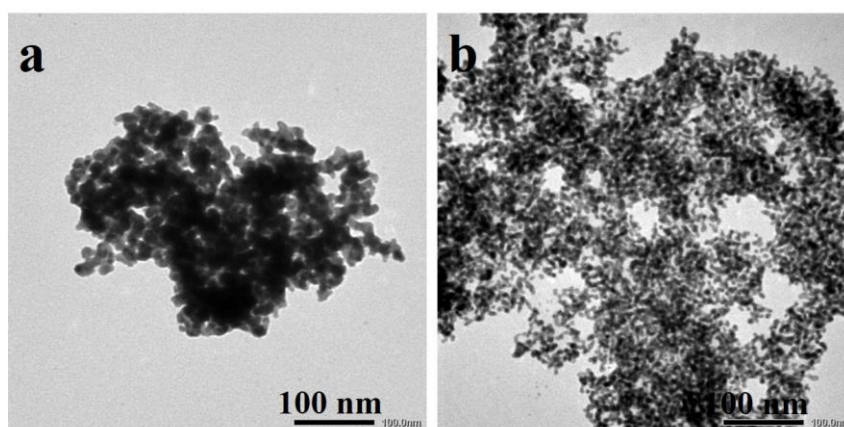

**Figure S10.** The TEM images of FePt NPs synthesized by addition of (a) KI and (b) KBr at 350 °C for 3 h.



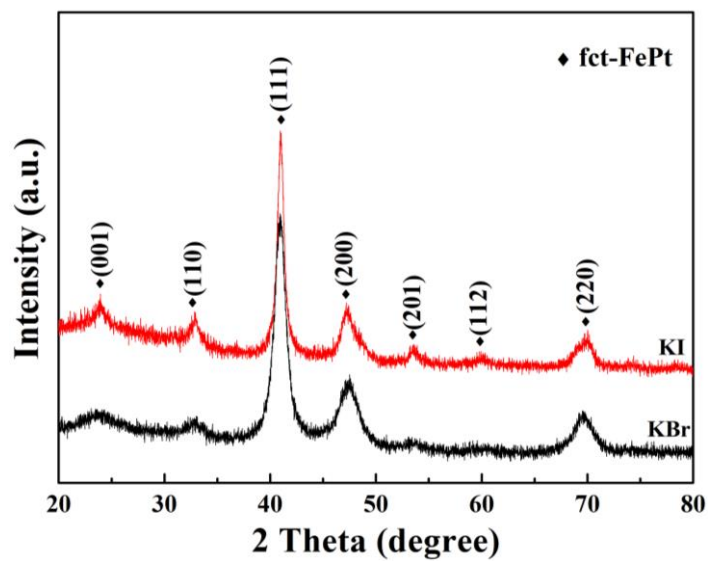

**Figure S11.** The XRD patterns of FePt NPs synthesized by addition of KI and KBr at 350 °C for 3 h.

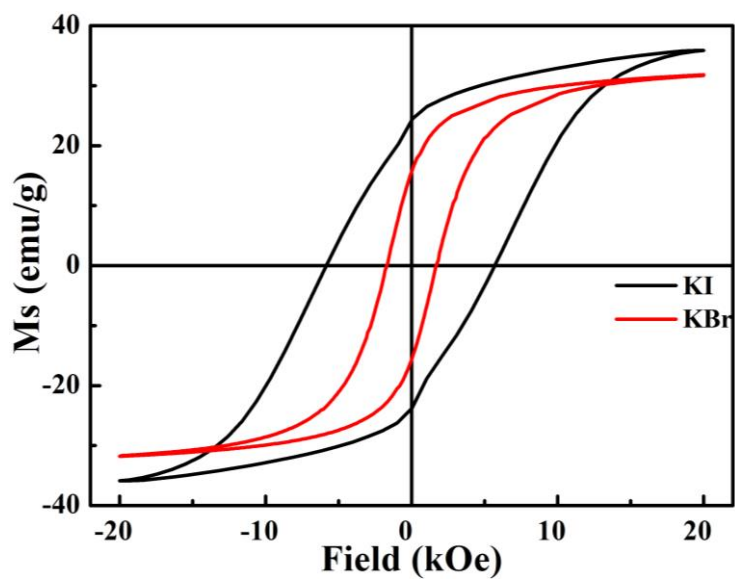

**Figure S12.** The hysteresis loops of FePt NPs synthesized by addition of KI and KBr at 350 °C for 3 h.
